# Supplementary material for: Self-assembled carbohydrate-based micelles for lectin targeting
Source: Royal Society of Chemistry journal article supplement (doi:10.1039/c0sm01411g), 2011-01-01

Supporting Information for the Manuscript Entitled

# Self-assembled carbohydrate-based micelles for lectin targeting

*Alexandre G. Dal Bó,<sup>†,‡</sup> Valdir Soldi,<sup>‡</sup> Fernando C. Giacomelli,<sup>§</sup> Bruno Jean,<sup>†</sup> Isabelle  
Pignot-Paintrand,<sup>†</sup> Redouane Borsali,<sup>†</sup> and Sébastien Fort<sup>†,\*</sup>*

<sup>†</sup>Centre de Recherches sur les Macromolécules Végétales (CERMAV-CNRS), BP 53, F-38041 Grenoble Cedex 9, France (affiliated with Université Joseph Fourier Grenoble 1 and member of the Institut de Chimie Moléculaire de Grenoble) ;

<sup>§</sup>Departamento de Química, Universidade Federal de Santa Catarina, 88040-900 Florianópolis – SC, Brazil;

<sup>§</sup>Centro de Ciências Naturais e Humanas, Universidade Federal do ABC, 09210-170 Santo André – SP, Brazil;

\*Corresponding author: Sébastien Fort

e-mail. [sebastien.fort@cermav.cnrs.fr](mailto:sebastien.fort@cermav.cnrs.fr)

Tel. +33 (0)4 76 03 76 64

Fax. +33 (0)4 76 54 72 03

**1. Summary of the Spherical Copolymer Micelle Model developed by Pedersen and Gerstenberg** (*Macromolecules*, 1996, 13, 1063).

The Spherical Copolymer Micelle Model describes the scattering for micelles as consisting of a homogeneous spherical core having corona chains that follow Gaussian statistics attached to the core surface as depicted in Figure S1.

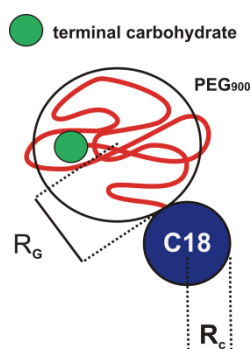

**Figure S1.** Schematic representation for the micellar form factor analysis according to the spherical copolymer micelle model. It considers a spherical core of radius  $R_c$  and Gaussian chains with radius of gyration  $R_G$  attached to the core.

The micellar form factor  $P_{mic}(q)$  involves four terms: self-correlation of the core, self-correlation of the chains, cross term between core and chains and the cross term between different chains:

$$P_{mic}(q) = N_{agg}^2 \beta_{core}^2 F_{core}(q, R_c) + N_{agg} \beta_{chain}^2 F_{chain}(q, R_G) + N_{agg} (N_{agg} - 1) \beta_{chain}^2 S_{chain-chain}(q) + 2 N_{agg}^2 \beta_{chain} \beta_{core} S_{core-chain}(q) \quad (1)$$

$N_{agg}$  is the number of aggregation of the micelles and  $\beta_{core}$  and  $\beta_{chain}$  accounts for the excess scattering length density of the core-forming (C<sub>18</sub>) and corona-forming block (PEG).

$F_{core}(q, R_c)$  is the self-correlation of a spherical core with radius  $R_c$  and it is given by the form factor amplitude of a sphere with a smoothly decaying scattering density at the surface:

$$F_{core}(q, R_c) = [\Phi(q, R_c)]^2 = \left[ 3 \frac{\sin(qR_c) - qR_c \cos(qR_c)}{(qR_c)^3} \right]^2 \quad (2)$$

The chains self-term is described by the Debye function:

$$F_{chain}(q, R_G) = \frac{2[\exp(-q^2 R_G^2) - 1 + q^2 R_G^2]}{(q^2 R_G^2)^2} \quad (3)$$

wherein,  $R_G$  is the radius of gyration of the Gaussian chains anchored to the core. The core-chain term is given by:

$$S_{core-chain}(q) = \psi(q, R_G) \Phi(q, R_c) \frac{\sin[q(R_c + dR_G)]}{q(R_c + dR_G)} \quad (4)$$

the function  $\psi(q, R_G)$  is:

$$\psi(q, R_G) = \frac{1 - \exp(-q^2 R_G^2)}{q^2 R_G^2} \quad (5)$$

and  $d \sim 1$  should be used in order to mimic the nonpenetration of the corona chains into the core, which is physically impossible. If  $d \sim 1$ , the starting point of the Gaussian chains is displaced to a value  $R \sim R_c + R_G$  away from the center of the particle.

The chain-chain term is given by:

$$S_{chain-chain}(q) = \psi^2(q, R_G) \frac{\sin[q(R_c + dR_G)]^2}{q^2 (R_c + dR_G)^2} \quad (6)$$

The value of  $\beta_{chain}$  for PEG<sub>900</sub> as calculated in the following way:

$$\beta_{chain} = NV_{PEG}(\sigma_{PEG} - \sigma_{solvent}) \quad (7)$$

where  $N$  is the degree of polymerization of the polymer segment ( $N = 19$ ),  $V_{PEG}$  is the volume of one PEG monomer unit,  $\sigma_{PEG}$  is the scattering length density of the polymer segment and  $\sigma_{\text{solvent}}$  is the scattering length density of the solvent (water). The volume occupied by a single monomer unit  $V_{PEG}$  was determined by taking into account the homopolymer density ( $d_{PEG}$ ) as:

$$V_{PEG} = \frac{M_{PEG}}{d_{PEG} N_A} \quad (8)$$

and the values of the scattering length densities of the solvent and monomer unit was calculated using the average chemical composition of each component and its mass density ( $d_x$ ) as:

$$\sigma_x = \frac{b_e d_x N_A}{M_x} \sum_i n_i z_i \quad (9)$$

where  $x$  accounts for H<sub>2</sub>O or PEG,  $N_A$  is the Avogadro's number, and  $n_i$  accounts for the number of atoms  $i$  in each component and  $z_i$  is the atomic number of the atom  $i$  ( $n_i z_i$  is the number of electrons in each unit). Finally,  $b_e$  is the Thomson scattering length (the scattering length of an electron -  $b_e = 2.817 \times 10^{-13}$  cm). All the parameters thus calculated are given in Table S1

**Table S1. Parameters used to determine  $\beta_{\text{chain}}$**

|                  | $d^a$<br>(g/cm <sup>3</sup> ) | $V$<br>(10 <sup>-23</sup> cm <sup>3</sup> ) | $M$<br>(g/mol) | chemical<br>composition         | $\sum n_i z_i$ | $\sigma$<br>(10 <sup>10</sup> cm <sup>-2</sup> ) |
|------------------|-------------------------------|---------------------------------------------|----------------|---------------------------------|----------------|--------------------------------------------------|
| PEG              | 1.08                          | 6.76                                        | 44.0           | C <sub>2</sub> H <sub>4</sub> O | 24             | 9.99                                             |
| H <sub>2</sub> O | 1.00                          | 2.99                                        | 18.0           | H <sub>2</sub> O                | 10             | 9.42                                             |

<sup>a</sup> values taken from reference 1.08 g/cm<sup>3</sup> (PEG) and g/cm<sup>3</sup> (H<sub>2</sub>O) from Kell Mortensen Polym. *Adv. Technol.* **2001**, 12, 2-22

## 2. NMR Data

### NMR spectra of Azide-PEG 900-stearate (3)

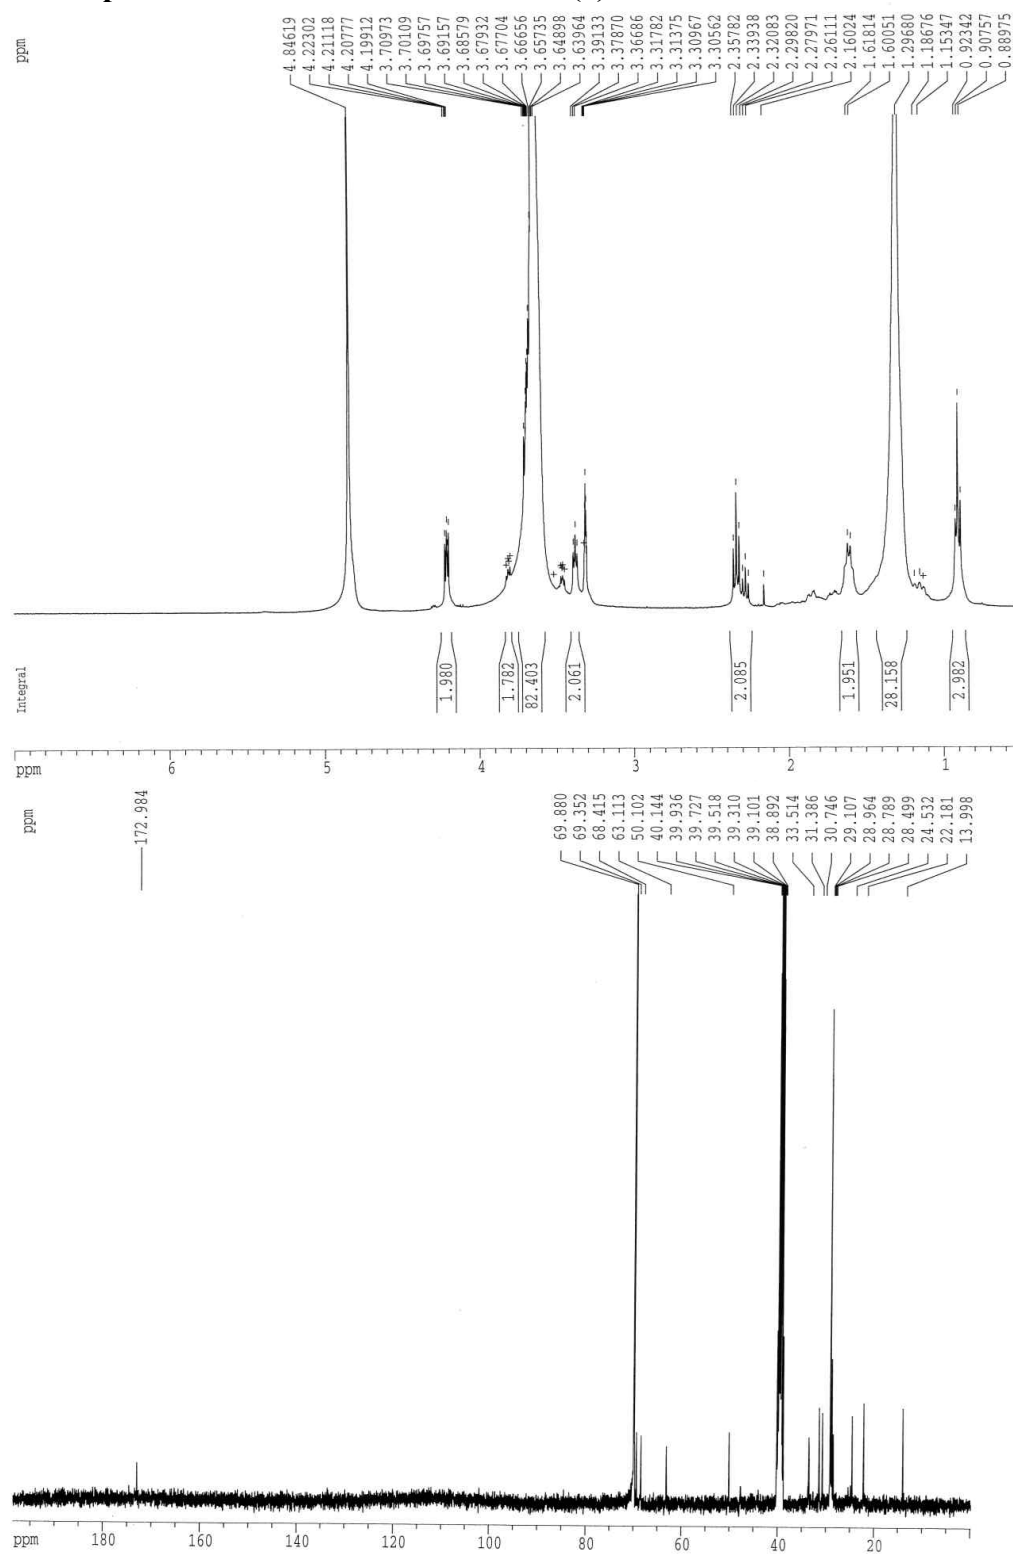



### NMR spectra of $\beta$ -Lactosyl-PEG 900-stearate conjugate (5)

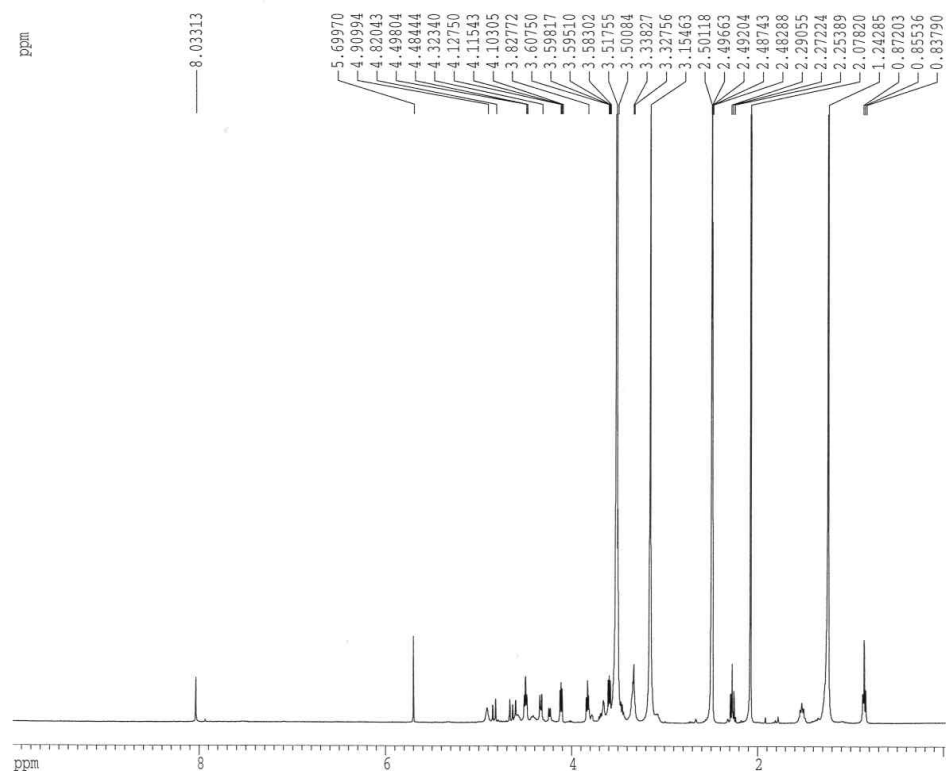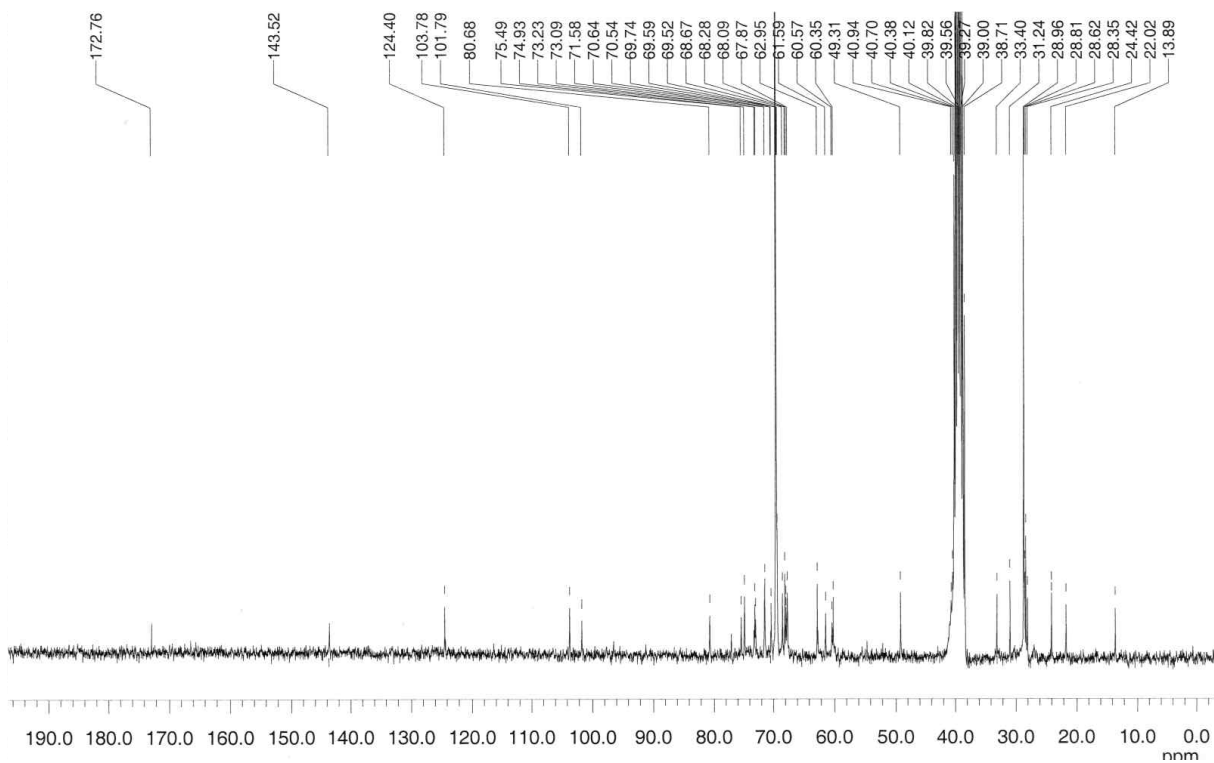

Supplement: c0sm01411g.pdf [file c0sm01411g.pdf]
